# Supplementary material for: Oxidative chemical vapour deposition of a graphene oxide carbocatalyst on 3D nickel foam as a collaborative electrocatalyst towards the hydrogen evolution reaction in acidic electrolyte
Source: Royal Society of Chemistry journal article supplement (doi:10.1039/c8se00161h), 2018-01-01
Supplement: c8se00161h1.pdf [file c8se00161h1.pdf]

## Supporting Information

### Oxidative chemical vapor deposition of graphene oxide carbocatalyst on 3D nickel foam as a collaborative electrocatalyst towards hydrogen evolution reaction in acidic electrolyte

Sangchai Sarawutanukul,<sup>a</sup> Nutthaphon Phattharasupakun,<sup>a</sup> Juthaporn Wutthiprom,<sup>a</sup> and Montree Sawangphruk<sup>\*a</sup>

<sup>a</sup>Department of Chemical and Biomolecular Engineering, School of Energy Science and Engineering, Vidyasirimedhi Institute of Science, and Technology, Rayong 21210, Thailand.

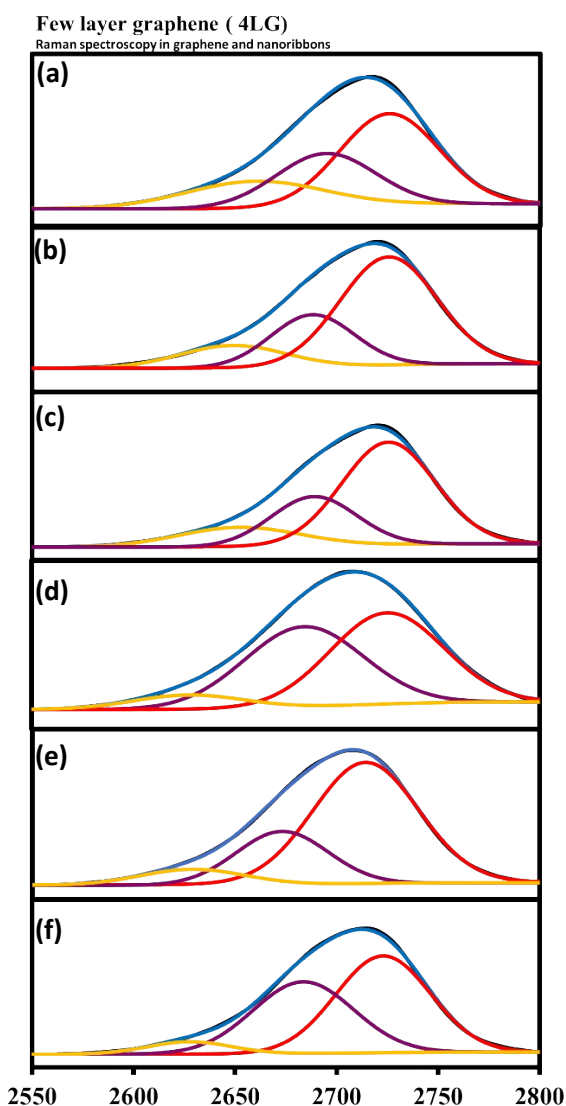

#### 1. Raman spectroscopy

**Fig. S1** Deconvoluted 2D Raman spectra of samples G to G-6 as shown in (a) - (f), respectively.

## 2. XPS spectra of G-G6 samples

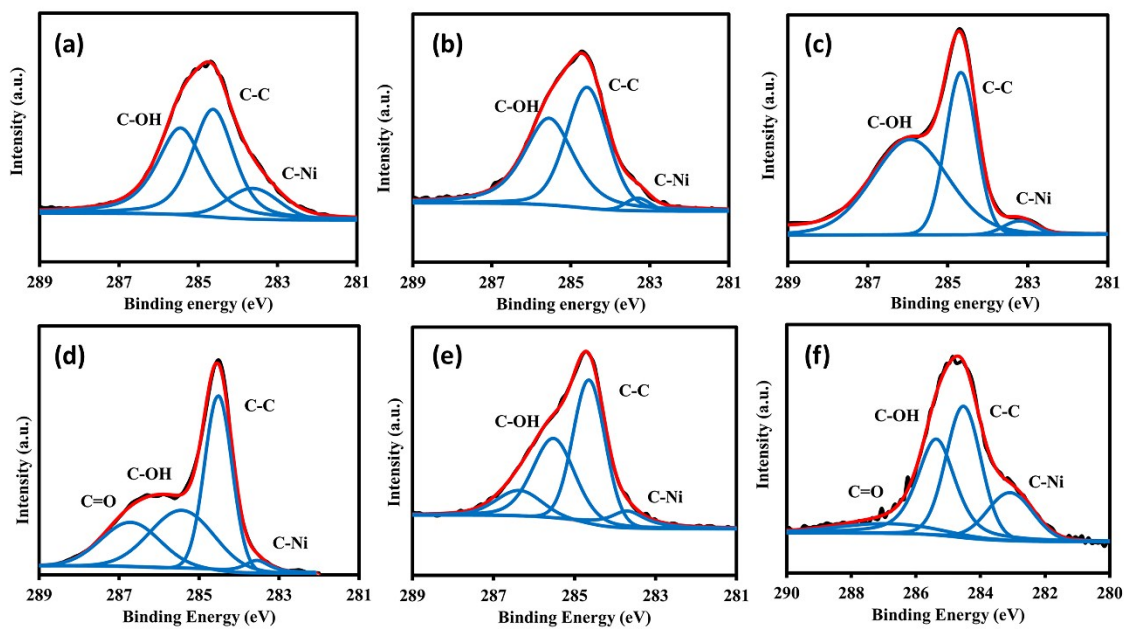

**Fig. S2** C1s XPS survey spectra of the samples G to G-6 as shown in (a) - (f), respectively

### 3. Evaluation of band gap energy

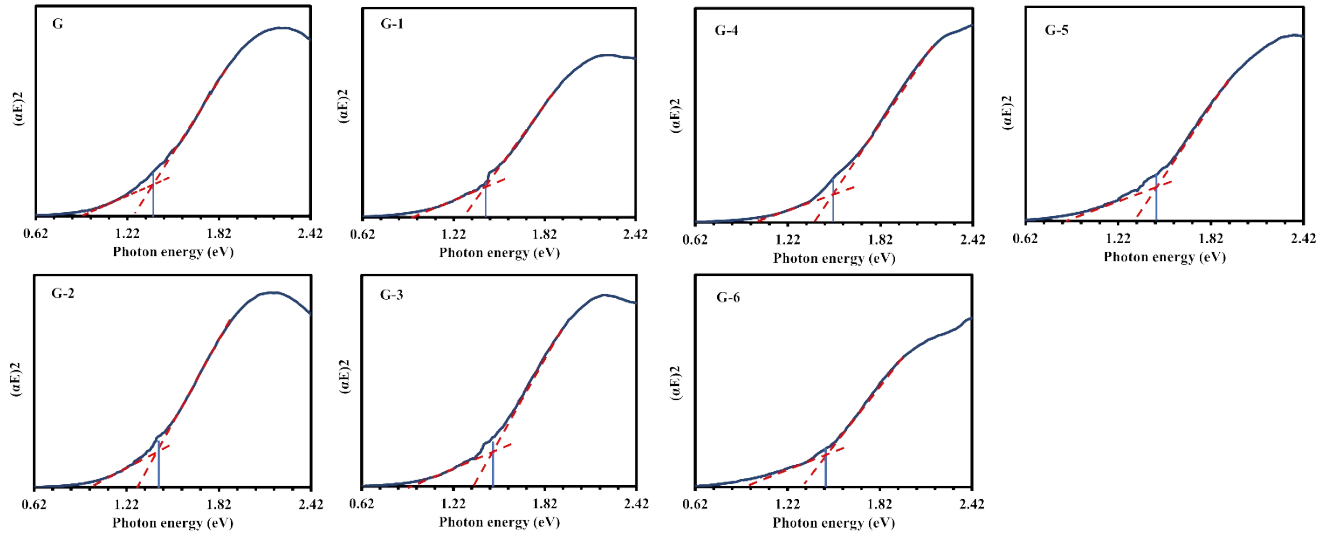

**Fig. S3.** Tauc plot analysis for the direct allowed transition from UV-Vis diffuse reflectance for the samples G to G-6 indicating a direct band gap transition from 1.37 eV up to 1.52 eV.

### 4. FESEM images of G-4 electrode and digital photograph of electrolyte after stability test

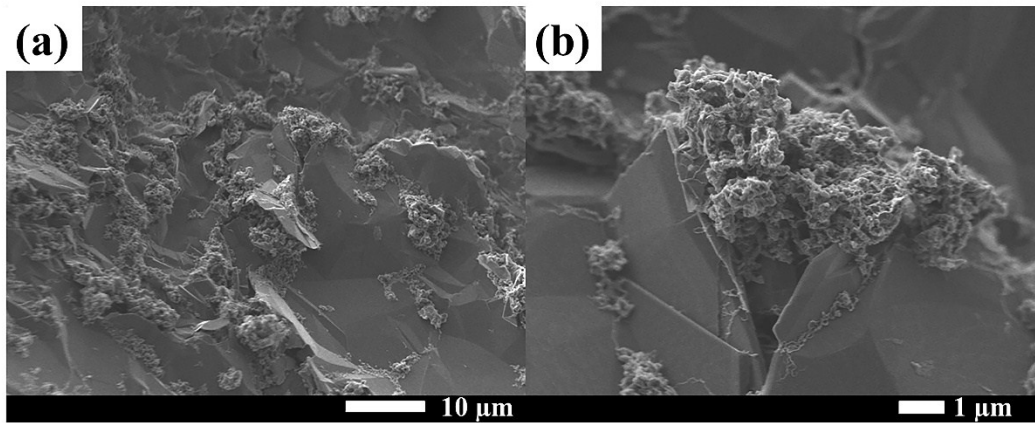

**Fig. S4.** FE-SEM images of the as-prepared G-4 sample after stability test.

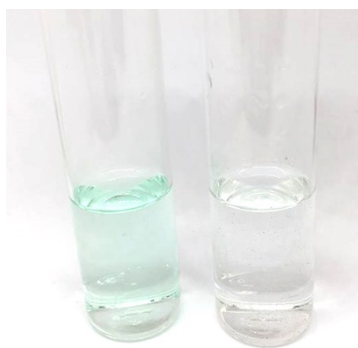

**Fig. S5.** Digital photograph of electrolyte after stability test of Ni foam (left) and G-4@Ni foam (Right).

**Table S1.** The comparison of HER performance between the oxidative graphene@Ni electrode with other electrodes in 0.5 M H<sub>2</sub>SO<sub>4</sub>.

| Electrodes                                                  | Overpotential<br>(mV, 10 mA cm <sup>-2</sup> ) | Tafel slope<br>(mV dec <sup>-1</sup> ) | Ref       |
|-------------------------------------------------------------|------------------------------------------------|----------------------------------------|-----------|
| Full-activation Ni foam                                     | 210                                            | 100.6                                  | 1         |
| MoS <sub>x</sub> grown on graphene-protected 3D Ni foam     | 151                                            | 42                                     | 2         |
| Mo <sub>2</sub> C nanoparticle on RGO hybrid                | 130                                            | 57.3                                   | 3         |
| WS <sub>2</sub> nanolayer heteroatom-doped graphene film    | 125                                            | -                                      | 4         |
| CoSe <sub>2</sub> nanoparticles grown on carbon fiber paper | 137                                            | -                                      | 5         |
| Oxidative graphene on nickel foam                           | 137.0                                          | 54.4                                   | This work |

**Table S2.** The weight of the electrode before and after hydrogen evolution tested.

| Weight(mg) | NiF    | G     | G-1   | G-2   | G-3   | G-4   | G-5   | G-6   |
|------------|--------|-------|-------|-------|-------|-------|-------|-------|
| Before     | 59.92  | 69.19 | 63.03 | 69.16 | 72.74 | 70.49 | 67.23 | 69.37 |
| After      | 16.19  | 62.61 | 61.61 | 67.87 | 71.50 | 69.62 | 65.97 | 68.22 |
|            | -43.73 | -1.13 | -1.42 | -1.29 | -1.24 | -0.87 | -1.26 | -1.55 |

## References

1. J. Lu, T. Xiong, W. Zhou, L. Yang, Z. Tang and S. Chen, *ACS App. Mater. Interfaces*, 2016, **8**, 5065-5069.
2. Y.-H. Chang, C.-T. Lin, T.-Y. Chen, C.-L. Hsu, Y.-H. Lee, W. Zhang, K.-H. Wei and L.-J. Li, *Adv. Mater.*, 2013, **25**, 756-760.
3. L. F. Pan, Y. H. Li, S. Yang, P. F. Liu, M. Q. Yu and H. G. Yang, *Chem. Commun.*, 2014, **50**, 13135-13137.

4. J. Duan, S. Chen, B. A. Chambers, G. G. Andersson and S. Z. Qiao, *Adv. Mater.*, 2015, **27**, 4234-4241.
5. D. Kong, H. Wang, Z. Lu and Y. Cui, *J. Am. Chem. Soc.*, 2014, **136**, 4897-4900.
